# Supplementary material
Source: PubMed Central journal article supplement (PMC5074603)
Supplement: supp_pp.16.00285_PP2016-00285R1_Supplemental_Figures_and_Tables.pdf [file supp_pp.16.00285_PP2016-00285R1_Supplemental_Figures_and_Tables.pdf]

1 **SUPPLEMENTAL DATA**

2 Supplemental tables and figures were ordered according to their appearance in the text.

3

4 **Supplemental Table S1.** Time points of floral transition at short-day (SD) and long-day  
5 (LD) conditions. Days after sowing (DAS) and developmental stage (according to  
6 Abendroth *et al.*, 2011) at which floral transition occurred in the maize lines 4F-240 BX  
7 16, 4F-350 CN 2, B77 and E2558W are indicated. Plants were grown in a greenhouse  
8 under LD conditions and in a growth chamber with SD and LD conditions. Greenhouse  
9 data are given as mean values  $\pm$  standard deviation of 4 (4F-240 BX 16, 4F-350 CN 2)  
10 and 3 (B77, E2558W) independently grown populations, which were grown over a  
11 period of two years.

|                     | long-day (greenhouse) |            | short-day (chamber) |            | long-day (chamber) |            |
|---------------------|-----------------------|------------|---------------------|------------|--------------------|------------|
|                     | time (DAS)            | dev. Stage | time (DAS)          | dev. stage | time (DAS)         | dev. stage |
| <b>4F-240 BX 16</b> | 24.5 ( $\pm$ 1.29)    | V5         | 24                  | V4         | 28                 | V4/V5      |
| <b>4F-350 CN 2</b>  | 34.5 ( $\pm$ 1.29)    | V7/V8      | 31                  | V5         | 35                 | V8         |
| <b>B77</b>          | 24.7 ( $\pm$ 0.58)    | V5         | 26                  | V4         | 26                 | V5         |
| <b>E2558W</b>       | 35.0 ( $\pm$ 1.73)    | V8         | 31                  | V5         | 33                 | V6         |

12

13

14

15

16

17

18

19

20

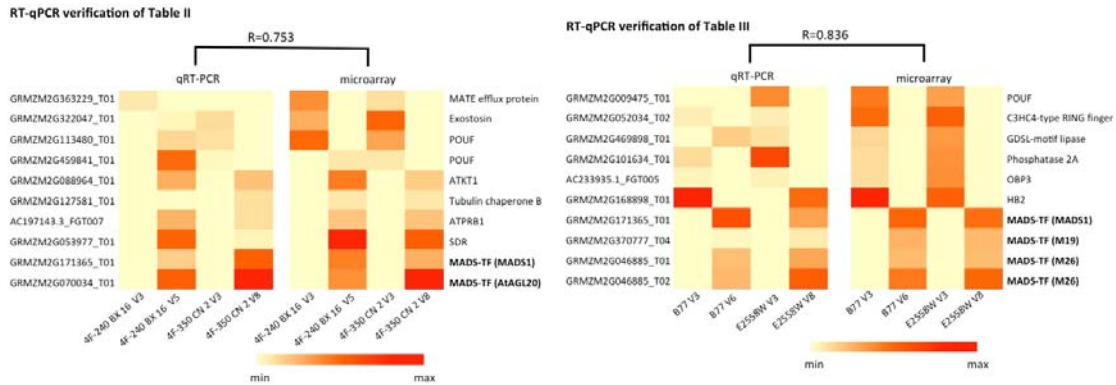

21

22 **Supplemental Figure S1.** Validation of microarray results by RT-qPCR. Expression  
 23 levels of 10 selected genes from each microarray dataset were detected by RT-qPCR.  
 24 Heat map on the left was constructed with mean expression levels derived from three  
 25 biological replicates, while the right one showed expression level change in microarray  
 26 analysis. For each gene in one inbreed line, the minimum expression level at a certain  
 27 developmental stage was set to 1, and relative expression level in the other sample was  
 28 calculated according to the minimum expression level. Relative expression pattern is  
 29 shown by color scales as indicated in the bottom. R value on top represents the  
 30 correlation coefficient value between the two platforms.

31

32

33 **Supplemental Table S2.** Identifiers of proteins homologous to ZmMADS1 and ZMM26  
 34 in the plant species *Arabidopsis thaliana*, *Hordeum vulgare*, *Oryza sativa*, *Triticum*  
 35 *aestivum* and *Zea mays*.

| <b>Species</b>                     | <b>Protein</b> | <b>Protein identifier</b> |
|------------------------------------|----------------|---------------------------|
| <b><i>Arabidopsis thaliana</i></b> | AtAGL24        | AT4G24540                 |
|                                    | AtSOC1         | AT2G45660                 |
|                                    | AtSVP          | AT2G22540                 |
| <b><i>Hordeum vulgare</i></b>      | HvBM1          | emb CAB97349.1            |
|                                    | HvBM1-2        | emb CAB97350.1            |
|                                    | HvBM10         | gb ABM21529.1             |
|                                    | HvSOC          | dbj BAK00484.1            |
|                                    | HvVRT-2        | gb ABB13345.1             |
| <b><i>Oryza sativa</i></b>         | OsMADS22       | LOC_Os02g52340            |
|                                    | OsMADS47       | LOC_Os03g08754            |
|                                    | OsMADS50       | LOC_Os03g03070            |
|                                    | OsMADS55       | LOC_Os06g11330            |
|                                    | OsMADS56       | LOC_Os10g39130            |
| <b><i>Triticum aestivum</i></b>    | TaAGL7         | gb ABF57947.1             |
|                                    | TaAGL11        | gb ABF57916.1             |
|                                    | TaAGL13        | gb ABF57917.1             |
|                                    | TaAGL20        | gb ABF57922.1             |
|                                    | TaAGL21        | gb ABF57923.1             |
|                                    | TaAGL36        | gb ABF57936.1             |
|                                    | TaAGL38        | gb ABF57938.1             |
|                                    | TaMADS10       | gb ABL11476.1             |
|                                    | TaVRT-2        | gb AAY43789.1             |
|                                    | TaWM1A         | gb CAM59039.1             |
|                                    | TaWM1B         | gb CAM59040.1             |
|                                    | TaWM21A        | gb CAM59065.1             |
|                                    | TaWM21B        | gb CAM59066.1             |
|                                    | TaWM22A        | gb CAM59067.1             |
|                                    | TaWM22B        | gb CAM59068.1             |
|                                    | TaWM24A        | gb CAM59069.1             |
|                                    | TaWM24B        | gb CAM59070.1             |
|                                    | TaWM28A        | gb CAM59074.1             |
| TaWM28B                            | gb CAM59075.1  |                           |
| <b><i>Zea mays</i></b>             | GRMZM2G070034  | GRMZM2G070034             |
|                                    | ZmMADS1        | GRMZM2G171365             |
|                                    | ZmMADS47       | GRMZM2G059102             |
|                                    | ZmMADS56       | GRMZM2G026223             |
|                                    | ZMM19          | GRMZM2G370777             |
|                                    | ZMM21          | GRMZM5G814279             |
|                                    | ZMM26          | GRMZM2G046885             |

36

37

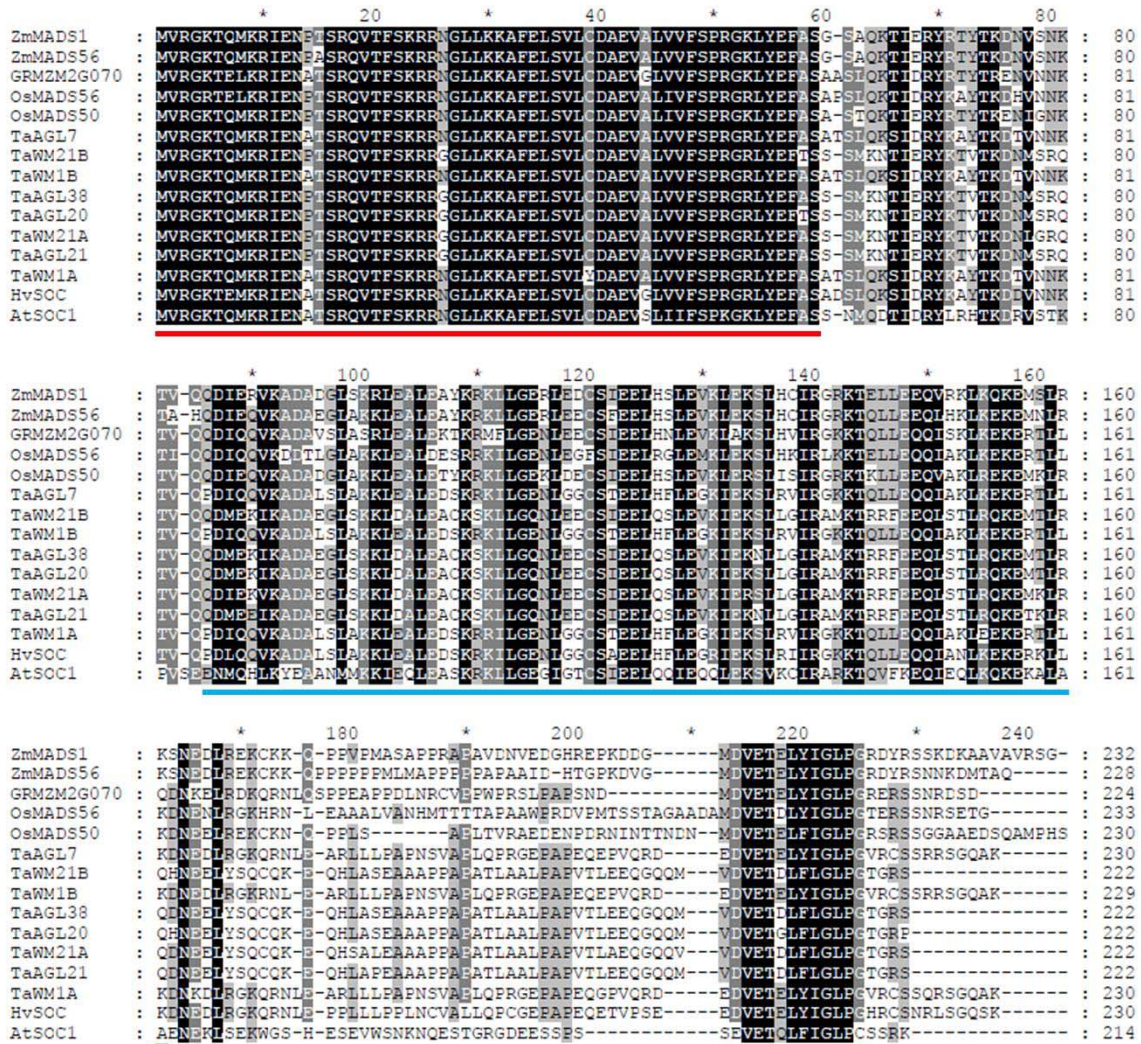

38

39 **Supplemental Figure S2.** Protein sequence alignment of ZmMADS1 and homologous  
 40 proteins from maize, rice, wheat, barley and *Arabidopsis*. Conserved amino acids  
 41 between the sequences are shaded in black. The red bar marks the MADS-domain, the  
 42 blue bar marks the K-domain and the green bar marks the SOC1 motif.

43

```

*          20          40          60          80
ZmM26 : -----MARERRRIKRIEAAARQVTFKRRRGLFKKAEI SVLCDADVALVVFSSSTGKLSGFASSSMNIIIDKYN : 70
ZmM19 : -----MARERRRIKRIEAAARQVTFKRRRGLFKKAEI SVLCDADVALVVFSSSTGKLSGFASSSMNIIIDKYS : 70
ZmMADS47 : -----MVGTKRERIAIRRIDNLAARQVTFKRRRGLFKKAEI SVLCDADVALVVFSSSTGKLSGFASSSMKQVIDRMD : 74
ZmM21 : -----MARERRRIKRIEAAARQVTFKRRRGLFKKAEI SVLCDADVALVVFSSSTGKLSGFASSSMNIIIDKYS : 70
HvBM10 : -----MARERRRIKRIEAAARQVTFKRRRGLFKKAEI SVLCDADVALVVFSSSTGKLSGFASSSMNIIIDKYS : 70
HvVRT-2 : -----MARERRRIKRIEAAARQVTFKRRRGLFKKAEI SVLCDADVALVVFSSSTGKLSGFASSSMNIIIDKYS : 70
HvBM1-2 : -----MAGKRERIAIRRIDNLAARQVTFKRRRGLFKKAEI SVLCDADVALVVFSSSTGKLSGFASSSMNIIIDKYN : 72
HvBM1 : -----MAGKRERIAIRRIDNLAARQVTFKRRRGLFKKAEI SVLCDADVALVVFSSSTGKLSGFASSSMNIIIDKYN : 72
OsMADS22 : -----MARERRRIKRIEAAARQVTFKRRRGLFKKAEI SVLCDADVALVVFSSSTGKLSGFASSSMNIIIDKYN : 70
OsMADS55 : -----MARERRRIKRIEAAARQVTFKRRRGLFKKAEI SVLCDADVALVVFSSSTGKLSGFASSSMNIIIDKYT : 70
OsMADS47 : MAGGGGGGGRGEGERAATGKRERIAIRRIDNLAARQVTFKRRRGLFKKAEI SVLCDADVALVVFSSSTGKLSGFASSSMNIIIDKYN : 89
TaAGL11 : -----MARERRRIKRIEAAARQVTFKRRRGLFKKAEI SVLCDADVALVVFSSSTGKLSGFASSSMNIIIDKYS : 70
TaWM22A : -----MARERRRIKRIEAAARQVTFKRRRGLFKKAEI SVLCDADVALVVFSSSTGKLSGFASSSMNIIIDKYS : 70
TaWM22B : -----MARERRRIKRIEAAARQVTFKRRRGLFKKAEI SVLCDADVALVVFSSSTGKLSGFASSSMNIIIDKYS : 70
TaWM24B : -----MARERRRIKRIEAAARQVTFKRRRGLFKKAEI SVLCDADVALVVFSSSTGKLSGFASSSMNIIIDKYS : 70
TaWM24A : -----MARERRRIKRIEAAARQVTFKRRRGLFKKAEI SVLCDADVALVVFSSSTGKLSGFASSSMNIIIDKYS : 70
TaAGL36 : -----MARERRRIKRIEAAARQVTFKRRRGLFKKAEI SVLCDADVALVVFSSSTGKLSGFASSSMNIIIDKYS : 70
TaVRT-2 : -----MARERRRIKRIEAAARQVTFKRRRGLFKKAEI SVLCDADVALVVFSSSTGKLSGFASSSMNIIIDKYS : 70
TaWM28B : -----MAGKRERIAIRRIDNLAARQVTFKRRRGLFKKAEI SVLCDADVALVVFSSSTGKLSGFASSSMNIIIDKYN : 72
TaWM28A : -----MAGKRERIAIRRIDNLAARQVTFKRRRGLFKKAEI SVLCDADVALVVFSSSTGKLSGFASSSMNIIIDKYN : 72
TaAGL13 : -----MAGKRERIAIRRIDNLAARQVTFKRRRGLFKKAEI SVLCDADVALVVFSSSTGKLSGFASSSMNIIIDKYN : 72
TaMADS10 : -----MAGFRERIAIRRIDNLAARQVTFKRRRGLFKKAEI SVLCDADVALVVFSSSTGKLSGFASSSMNIIIDKYN : 72
AtSVP : -----MAREKIRIKRIDNLAARQVTFKRRRGLFKKAEI SVLCDADVALVVFSSSTGKLSGFASSSMKREIVLRHN : 70
AtAGL24 : -----MAREKIRIKRIDNLAARQVTFKRRRGLFKKAEI SVLCDADVALVVFSSSTGKLSGFASSSMRRIILERN : 70

```

```

*          100          120          140          160          180
ZmM26 : THSKNLKTE-QPSIDIN-LEHSKYANINEQLAEASIRLRMRGEELEGLNVELOCLEKNLESLGHFVICTKQQQLEQINIDLEPKST : 157
ZmM19 : THSKNLKAE-QPSIDIN-LEHSKYANINEQLAEASIRLRMRGEELEGLNVELOCLEKNLESLGHFVICTKQQQLEQISDLQKST : 157
ZmMADS47 : SHSKNLRSPEQSSQLQSHMDGTCARLKEELAEASIRLRMRGEELEGLNVELOCLEKNLESLGHFVICTKRSCKILLDEISLQPKRT : 163
ZmM21 : THSKNLKSHQPSIDIN-VEOSKYSGNEQLAEASIRLRMRGEELEGLNVELOCLEKNLESLGHFVICTKQDLLEMOQIGELLQKGT : 158
HvBM10 : THSKNLKTD-OPTADIN-LEHSKYANINDOLAEASIRLRMRGEELEGLNVELOCLEKNLETLGHFVICTKQQQLEQINIDLEPKST : 157
HvVRT-2 : THSKNLKSDQPPADIN-LEHCKYDSINEQLAEASIRLRMRGEELEGLNVELOCLEKNLETLGHFVICTKQRQEMQOISDLQKGT : 158
HvBM1-2 : SHSKLKKVDEPSQDTH--EDSNCARLDELAEASIRLRMRGEELEGLNVELOCLEKNLESLGHFVICTKRSCKIMQOISLEPKRV : 159
HvBM1 : SHSKLKKVDEPSQDTH--EDSNCARLDELAEASIRLRMRGEELEGLNVELOCLEKNLESLGHFVICTKRSCKIMQOISLEPKRV : 159
OsMADS22 : THSKNLKAE-QPSIDIN-LEHSKYANINEQLAEASIRLRMRGEELEGLNVELOCLEKNLESLGHFVICTKQQQEMQOISLEPKST : 157
OsMADS55 : THSKNLKTDKQPSIDIN--MRGEELEGLNVELOCLEKNLESLGHFVICTKQQQEMQOISLEPKST : 136
OsMADS47 : SHSKTLQRAE-PSQDLQGEDSTCARLKEELAEASIRLRMRGEELEGLNVELOCLEKNLESLGHFVICTKRSCKILLDEISLQPKRT : 177
TaAGL11 : THSKNLKTD-OPTADIN-LEHSKYANINDOLAEASIRLRMRGEELEGLNVELOCLEKNLETLGHFVICTKQQQLEQINIDLEPKST : 157
TaWM22A : THSKNLKTD-REPADIN-LEHSKYANINDOLAEASIRLRMRGEELEGLNVELOCLEKNLETLGHFVICTKQQQLEQINIDLEPKST : 157
TaWM22B : THSKNLKTD-OPTADIN-LEHSKYANINDOLAEASIRLRMRGEELEGLNVELOCLEKNLETLGHFVICTKQQQLEQINIDLEPKST : 157
TaWM24B : THSKNLKSDQPPADIN-LEHCKYDSINEQLAEASIRLRMRGEELEGLNVELOCLEKNLETLGHFVICTKQRQEMQOISDLQKGT : 158
TaWM24A : THSKNLKSDQPPADIN-LEHCKYDSINEQLAEASIRLRMRGEELEGLNVELOCLEKNLETLGHFVICTKQRQEMQOISDLQKGT : 158
TaAGL36 : THSKNLKSDQPPADIN-LEHCKYDSINEQLAEASIRLRMRGEELEGLNVELOCLEKNLETLGHFVICTKQRQEMQOISDLQKGT : 158
TaVRT-2 : THSKNLKSDQPPADIN-LEHCKYDSINEQLAEASIRLRMRGEELEGLNVELOCLEKNLETLGHFVICTKQRQEMQOISDLQKGT : 158
TaWM28B : SHSKLKKADEPSQDTH--EDSNCARLDELAEASIRLRMRGEELEGLNVELOCLEKNLESLGHFVICTKRSCKIMQOISLEPKRV : 159
TaWM28A : SHSKLKKADEPSQDTH--EDSNCARLDELAEASIRLRMRGEELEGLNVELOCLEKNLESLGHFVICTKRSCKIMQOISLEPKRV : 159
TaAGL13 : SHSKLKKADEPSQDTH--EDSNCARLDELAEASIRLRMRGEELEGLNVELOCLEKNLESLGHFVICTKRSCKIMQOISLEPKRV : 159
TaMADS10 : SHSKLKKADEPSQDTH--EDSNCARLDELAEASIRLRMRGEELEGLNVELOCLEKNLESLGHFVICTKRSCKIMQOISLEPKRV : 159
AtSVP : LQSKNLEKLD-QPSHETQLVENSNDHRSKIDAKSHIRLRMRGEELEGLNVELOCLEKNLESLGHFVICTKRSCKIMQOISLEPKRV : 158
AtAGL24 : LEASINIKLMDPPSTHTR--LQSKNLEKLD-QPSHETQLVENSNDHRSKIDAKSHIRLRMRGEELEGLNVELOCLEKNLESLGHFVICTKRSCKIMQOISLEPKRV : 158

```

```

80          *          200          *          220          *          240          *          260
ZmM26 : QIAGENMRLRNOVSCIPVAGKQ-----AVAD--TE-NVIAFEGQSSSVMTALHSGS--SQDNDGSDVSLKLEGLFCVAVK : 228
ZmM19 : QIAGENMRLRNOVSHIPVAGKQ-----SVAD--AE-NVIAFEGQSSSVMTALHSGS--SQDNDGSDVSLKLEGLFCVAVK : 228
ZmMADS47 : QIAGENMRLRNOVTRVSRMETQ-----LGAD--PE-FVVEEGQSSSVTNTSYPRP--PLDTESSDTSRLRGLFLFSK : 233
ZmM21 : QIADENRRLKKECK-----ISSLKTGS-----RNI----- : 183
HvBM10 : QIAGENMRLRNOVACVPTAGKL-----VVVD--TE-NVIAFEGQSSSVMTALHSGS--SQDNDGSDVSLKLEGLFCVAVK : 225
HvVRT-2 : QIAGENMRLRNOVACVPTAGKL-----VVVD--TE-NVIAFEGQSSSVMTALHSGS--SQDNDGSDVSLKLEGLFCVAVK : 223
HvBM1-2 : QIAGENMRLRNOVACVPTAGKL-----EM-----QVAA--DPLVVVYDEGQSSSVTNTSYPRP--PLDTESSDTSRLRGLFLFSK : 227
HvBM1 : QIAGENMRLRNOVACVPTAGKL-----EM-----QVAA--DPLVVVYDEGQSSSVTNTSYPRP--PLDTESSDTSRLRGLFLFSK : 229
OsMADS22 : QIAGENMRLRNOVSCIPVAGKQ-----AVAD--TE-NVIAFEGQSSSVMTALHSGS--SQDNDGSDVSLKLEGLFCVAVK : 228
OsMADS55 : QIAGENMRLRNOVTRVSRMETQ-----LGAD--PE-FVVEEGQSSSVTNTSYPRP--PLDTESSDTSRLRGLFLFSK : 199
OsMADS47 : QIAGENMRLRNOVTRVSRMETQ-----QPGP--DS-EIVVEEGQSSSVTNTSYPRP--PPDNDYSSDTSRLRGLFLFSK : 248
TaAGL11 : QIAGENMRLRNOVACVPTAGKL-----VVVD--TE-NVIAFEGQSSSVMTALHSGS--SQDNDGSDVSLKLEGLFCVAVK : 228
TaWM22A : QIAGENMRLRNOVACVPTAGKL-----VVVD--TE-NVIAFEGQSSSVMTALHSGS--SQDNDGSDVSLKLEGLFCVAVK : 228
TaWM22B : QIAGENMRLRNOVACVPTAGKL-----VVVD--TE-NVIAFEGQSSSVMTALHSGS--SQDNDGSDVSLKLEGLFCVAVK : 228
TaWM24B : QIAGENMRLRNOVACVPTAGKL-----AVAE--AE-NVVEPDAHSSDSVMTAVHSGS--SQDNDGSDVSLKLEGLFCVAVK : 226
TaWM24A : QIAGENMRLRNOVACVPTAGKL-----AVAE--AE-NVVEPDAHSSDSVMTAVHSGS--SQDNDGSDVSLKLEGLFCVAVK : 226
TaAGL36 : QIAGENMRLRNOVACVPTAGKL-----AVADAE--NVVDDVHSSDSVMTAVHSGS--SQDNDGSDVSLKLEGLFCVAVK : 228
TaVRT-2 : QIAGENMRLRNOVACVPTAGKL-----AVAE--AE-NVVEPDAHSSDSVMTAVHSGS--SQDNDGSDVSLKLEGLFCVAVK : 226
TaWM28B : QIAGENMRLRNOVACVPTAGKL-----EM-----QVAA--DS-PAVVEEGQSSSVTNTSYPRP--PLDTESSDTSRLRGLFLFSK : 226
TaWM28A : QIAGENMRLRNOVACVPTAGKL-----EM-----QVAA--DS-PAVVEEGQSSSVTNTSYPRP--PLDTESSDTSRLRGLFLFSK : 226
TaAGL13 : QIAGENMRLRNOVACVPTAGKL-----EM-----QVAA--DS-PAVVEEGQSSSVTNTSYPRP--PLDTESSDTSRLRGLFLFSK : 226
TaMADS10 : QIAGENMRLRNOVACVPTAGKL-----EM-----QVAA--DS-PAVVEEGQSSSVTNTSYPRP--PLDTESSDTSRLRGLFLFSK : 226
AtSVP : QIADENRRLKKECK-----ISSLKTGS-----RNI----- : 240
AtAGL24 : QIADENRRLKKECK-----ISSLKTGS-----RNI----- : 220

```

44

45 **Supplemental Figure S3.** Protein sequence alignment of ZMM26 and its homologs from  
46 maize, barley, rice, wheat and *Arabidopsis*. Conserved amino acids between the  
47 sequences are shaded in black. The red bar marks the MADS-domain and the blue bar  
48 marks the K-domain.

49

50 **Supplemental Table S3.** Log<sub>2</sub> transformed relative expression values of *ZmGIGZ1a* in  
 51 leaves of the maize lines 4F-350 CN 2, 4F-240 BX 16, E2558W and B77. Samples were  
 52 taken in 4 hour intervals over a period of 2 days. Plants were grown under SD  
 53 conditions. Mean values of biological triplicates and standard deviations (st dev) are  
 54 indicated.

| SD <i>GIGZ1a</i><br>time (h) | 4F-350 CN2 |        | 4F-240 BX16 |        | E2558W |        | B77  |        |
|------------------------------|------------|--------|-------------|--------|--------|--------|------|--------|
|                              | mean       | st dev | mean        | st dev | mean   | st dev | mean | st dev |
| 0                            | 0,30       | 0,46   | 0,49        | 0,60   | 0,36   | 0,13   | 0,13 | 0,18   |
| 4                            | 3,11       | 0,56   | 4,53        | 1,05   | 3,04   | 0,58   | 1,76 | 0,90   |
| 8                            | 5,42       | 0,07   | 6,56        | 1,33   | 5,69   | 0,88   | 3,53 | 0,84   |
| 12                           | 4,62       | 0,67   | 7,38        | 0,20   | 5,27   | 0,76   | 3,30 | 0,40   |
| 16                           | 3,86       | 0,07   | 3,03        | 0,73   | 4,47   | 0,39   | 3,22 | 0,61   |
| 20                           | 2,27       | 0,67   | 2,56        | 1,72   | 2,44   | 0,63   | 1,46 | 0,61   |
| 24                           | 0,73       | 0,32   | 1,70        | 1,33   | 0,21   | 0,30   | 0,43 | 0,24   |
| 28                           | 3,03       | 0,34   | 4,50        | 1,11   | 3,25   | 0,62   | 1,68 | 0,73   |
| 32                           | 5,28       | 0,14   | 5,92        | 0,93   | 5,69   | 0,63   | 3,87 | 0,70   |
| 36                           | 5,01       | 0,30   | 5,87        | 1,02   | 5,10   | 0,47   | 3,66 | 0,49   |
| 40                           | 4,20       | 0,23   | 4,34        | 1,49   | 3,98   | 0,98   | 3,40 | 0,85   |
| 44                           | 1,62       | 0,35   | 0,76        | 0,81   | 2,35   | 0,40   | 1,25 | 0,60   |
| 48                           | 0,03       | 0,04   | 0,43        | 0,55   | 0,45   | 0,42   | 0,02 | 0,03   |

55

56

57 **Supplemental Table S4.** Log<sub>2</sub> transformed relative expression values of *ZmGIGZ1a* in  
 58 leaves of the maize lines 4F-350 CN 2, 4F-240 BX 16, E2558W and B77. Samples were  
 59 taken in 4 hour intervals over a period of 2 days. Plants were grown under LD  
 60 conditions. Mean values of biological triplicates and standard deviations (st dev) are  
 61 indicated.

| LD <i>GIGZ1a</i><br>time (h) | 4F-350 CN2 |        | 4F-240 BX16 |        | E2558W |        | B77  |        |
|------------------------------|------------|--------|-------------|--------|--------|--------|------|--------|
|                              | mean       | st dev | mean        | st dev | mean   | st dev | mean | st dev |
| 0                            | 0,93       | 0,31   | 0,00        | 0,00   | 0,88   | 0,35   | 0,77 | 0,55   |
| 4                            | 2,54       | 0,11   | 4,10        | 0,59   | 3,87   | 0,34   | 1,93 | 0,63   |
| 8                            | 4,35       | 0,40   | 8,14        | 0,79   | 5,45   | 0,64   | 3,76 | 0,24   |
| 12                           | 4,83       | 0,28   | 6,38        | 0,45   | 5,32   | 0,29   | 4,56 | 0,66   |
| 16                           | 2,78       | 0,15   | 4,08        | 0,76   | 3,70   | 0,21   | 3,30 | 0,58   |
| 20                           | 2,45       | 0,06   | 1,57        | 0,67   | 1,61   | 0,47   | 1,76 | 0,57   |
| 24                           | 0,42       | 0,23   | 0,35        | 0,26   | 0,00   | 0,00   | 0,31 | 0,27   |
| 28                           | 2,49       | 0,34   | 5,51        | 1,03   | 4,01   | 0,42   | 1,82 | 0,68   |
| 32                           | 4,26       | 0,18   | 6,40        | 0,28   | 6,42   | 0,29   | 4,22 | 0,62   |
| 36                           | 4,72       | 0,51   | 6,59        | 0,88   | 6,23   | 0,27   | 4,56 | 0,27   |
| 40                           | 2,90       | 0,28   | 4,68        | 0,57   | 4,15   | 0,46   | 3,41 | 0,47   |
| 44                           | 2,40       | 0,47   | 3,08        | 1,92   | 2,92   | 0,69   | 1,43 | 0,33   |
| 48                           | 0,00       | 0,00   | 1,98        | 2,17   | 1,13   | 0,12   | 0,33 | 0,33   |

62

63

64

65 **Supplemental Table S5.** Log2 transformed relative expression values of *ZmMADS1* in  
 66 leaves of the maize lines 4F-350 CN 2, 4F-240 BX 16, E2558W and B77. Samples were  
 67 taken in 4 hour intervals over a period of 2 days. Plants were grown under SD  
 68 conditions. Mean values of biological triplicates and standard deviations (st dev) are  
 69 indicated.

| SD <i>MADS1</i><br>time (h) | 4F-350 CN2 |        | 4F-240 BX16 |        | E2558W |        | B77  |        |
|-----------------------------|------------|--------|-------------|--------|--------|--------|------|--------|
|                             | mean       | st dev | mean        | st dev | mean   | st dev | mean | st dev |
| 0                           | 3,70       | 0,03   | 3,55        | 0,66   | 2,90   | 0,30   | 4,04 | 0,35   |
| 4                           | 0,15       | 0,14   | 1,92        | 2,43   | 0,99   | 0,32   | 1,55 | 0,63   |
| 8                           | 0,18       | 0,13   | 0,52        | 0,69   | 0,31   | 0,44   | 0,22 | 0,31   |
| 12                          | 0,66       | 0,47   | 2,06        | 1,46   | 1,24   | 0,23   | 0,24 | 0,30   |
| 16                          | 2,77       | 0,21   | 2,63        | 1,92   | 2,95   | 0,58   | 2,01 | 0,52   |
| 20                          | 2,05       | 0,48   | 3,38        | 1,59   | 2,80   | 0,17   | 2,58 | 0,68   |
| 24                          | 2,75       | 0,15   | 4,41        | 0,30   | 2,49   | 0,32   | 3,52 | 0,55   |
| 28                          | 0,91       | 0,70   | 3,10        | 1,05   | 0,66   | 0,33   | 1,34 | 0,33   |
| 32                          | 0,67       | 0,31   | 0,81        | 0,42   | 1,01   | 0,72   | 0,90 | 0,39   |
| 36                          | 1,07       | 0,31   | 2,32        | 0,67   | 0,90   | 0,29   | 0,60 | 0,31   |
| 40                          | 2,25       | 0,57   | 3,02        | 1,40   | 2,09   | 0,57   | 1,47 | 0,98   |
| 44                          | 1,91       | 0,43   | 2,20        | 0,48   | 2,51   | 0,17   | 3,23 | 0,53   |
| 48                          | 2,70       | 0,44   | 2,33        | 0,60   | 3,11   | 0,82   | 3,47 | 0,89   |

70

71

72 **Supplemental Table S6.** Log2 transformed relative expression values of *ZmMADS1* in  
 73 leaves of the maize lines 4F-350 CN 2, 4F-240 BX 16, E2558W and B77. Samples were  
 74 taken in 4 hour intervals over a period of 2 days. Plants were grown under LD conditions.  
 75 Mean values of biological triplicates and standard deviations (st dev) are indicated.

| LD <i>MADS1</i><br>time (h) | 4F-350 CN2 |        | 4F-240 BX16 |        | E2558W |        | B77  |        |
|-----------------------------|------------|--------|-------------|--------|--------|--------|------|--------|
|                             | mean       | st dev | mean        | st dev | mean   | st dev | mean | st dev |
| 0                           | 2,33       | 0,29   | 1,94        | 1,06   | 1,86   | 0,23   | 3,03 | 0,35   |
| 4                           | 0,80       | 0,12   | 0,62        | 0,25   | 0,57   | 0,42   | 1,43 | 0,43   |
| 8                           | 0,03       | 0,04   | 0,83        | 0,58   | 0,24   | 0,34   | 0,13 | 0,16   |
| 12                          | 0,55       | 0,09   | 0,23        | 0,17   | 0,18   | 0,06   | 0,06 | 0,08   |
| 16                          | 0,73       | 0,16   | 1,29        | 0,91   | 0,92   | 0,40   | 1,06 | 0,34   |
| 20                          | 2,36       | 0,16   | 1,66        | 0,67   | 1,03   | 0,19   | 1,72 | 0,48   |
| 24                          | 3,13       | 0,54   | 1,19        | 0,34   | 1,48   | 0,32   | 3,06 | 0,20   |
| 28                          | 0,92       | 0,05   | 1,50        | 0,19   | 0,46   | 0,07   | 1,22 | 0,44   |
| 32                          | 0,61       | 0,16   | 0,40        | 0,32   | 0,57   | 0,48   | 0,95 | 0,31   |
| 36                          | 0,74       | 0,63   | 0,85        | 0,61   | 0,83   | 0,28   | 1,24 | 0,11   |
| 40                          | 1,30       | 0,40   | 0,91        | 0,64   | 0,50   | 0,17   | 1,35 | 0,38   |
| 44                          | 2,26       | 0,36   | 1,19        | 0,64   | 1,13   | 0,70   | 2,08 | 0,50   |
| 48                          | 2,62       | 0,22   | 2,06        | 0,27   | 2,32   | 0,14   | 2,87 | 0,56   |

76

77

78

79 **Supplemental Table S7.** Log2 transformed relative expression values of *ZMM19* in  
 80 leaves of the maize lines 4F-350 CN 2, 4F-240 BX 16, E2558W and B77. Samples were  
 81 taken in 4 hour intervals over a period of 2 days. Plants were grown under SD  
 82 conditions. Mean values of biological triplicates and standard deviations (st dev) are  
 83 indicated.

| SD <i>ZmM19</i><br>time (h) | 4F-350 CN2 |        | 4F-240 BX16 |        | E2558W |        | B77  |        |
|-----------------------------|------------|--------|-------------|--------|--------|--------|------|--------|
|                             | mean       | st dev | mean        | st dev | mean   | st dev | mean | st dev |
| 0                           | 0,86       | 0,16   | 1,10        | 1,01   | 0,44   | 0,16   | 1,29 | 0,31   |
| 4                           | 1,60       | 0,53   | 2,01        | 1,35   | 1,53   | 0,36   | 2,25 | 0,63   |
| 8                           | 2,59       | 0,12   | 2,32        | 0,83   | 1,90   | 0,35   | 2,34 | 0,19   |
| 12                          | 1,28       | 0,55   | 3,08        | 0,62   | 1,53   | 0,65   | 1,51 | 0,06   |
| 16                          | 1,11       | 0,23   | 0,85        | 0,63   | 1,27   | 0,44   | 1,86 | 0,34   |
| 20                          | 0,34       | 0,48   | 0,31        | 0,44   | 0,28   | 0,22   | 0,35 | 0,25   |
| 24                          | 1,49       | 0,46   | 2,11        | 1,18   | 0,15   | 0,19   | 0,80 | 0,38   |
| 28                          | 1,60       | 0,24   | 1,82        | 1,05   | 1,20   | 0,31   | 1,98 | 0,34   |
| 32                          | 2,37       | 0,25   | 2,33        | 1,22   | 2,60   | 0,37   | 2,39 | 0,35   |
| 36                          | 1,78       | 0,30   | 2,24        | 0,77   | 1,48   | 0,29   | 2,14 | 0,08   |
| 40                          | 1,16       | 0,19   | 3,19        | 1,06   | 0,86   | 0,53   | 1,95 | 0,51   |
| 44                          | 0,07       | 0,09   | 0,56        | 0,64   | 0,05   | 0,05   | 0,07 | 0,10   |
| 48                          | 1,21       | 0,04   | 1,00        | 0,51   | 0,40   | 0,66   | 0,25 | 0,22   |

84

85

86 **Supplemental Table S8.** Log2 transformed relative expression values of *ZMM19* in  
 87 leaves of the maize lines 4F-350 CN 2, 4F-240 BX 16, E2558W and B77. Samples were  
 88 taken in 4 hour intervals over a period of 2 days. Plants were grown under LD  
 89 conditions. Mean values of biological triplicates and standard deviations (st dev) are  
 90 indicated.

| LD <i>ZmM19</i><br>time (h) | 4F-350 CN2 |        | 4F-240 BX16 |        | E2558W |        | B77  |        |
|-----------------------------|------------|--------|-------------|--------|--------|--------|------|--------|
|                             | mean       | st dev | mean        | st dev | mean   | st dev | mean | st dev |
| 0                           | 0,74       | 0,51   | 0,39        | 0,38   | 0,54   | 0,27   | 1,03 | 0,37   |
| 4                           | 1,08       | 0,36   | 1,82        | 0,34   | 1,11   | 0,33   | 1,75 | 0,19   |
| 8                           | 1,20       | 0,71   | 2,18        | 0,58   | 0,99   | 0,32   | 1,88 | 0,11   |
| 12                          | 1,31       | 0,48   | 2,29        | 0,50   | 1,14   | 0,30   | 2,29 | 0,60   |
| 16                          | 0,00       | 0,00   | 1,33        | 0,32   | 0,49   | 0,39   | 1,34 | 0,41   |
| 20                          | 0,93       | 0,52   | 0,74        | 0,82   | 0,14   | 0,10   | 0,96 | 0,78   |
| 24                          | 0,97       | 0,14   | 0,76        | 0,67   | 0,22   | 0,18   | 1,11 | 0,79   |
| 28                          | 1,65       | 0,61   | 1,24        | 0,23   | 1,69   | 0,38   | 1,83 | 0,33   |
| 32                          | 1,51       | 0,37   | 2,42        | 0,25   | 2,35   | 0,42   | 2,30 | 0,57   |
| 36                          | 1,67       | 0,90   | 2,08        | 0,48   | 2,19   | 0,06   | 2,46 | 0,25   |
| 40                          | 0,59       | 0,34   | 1,90        | 0,83   | 0,70   | 0,22   | 1,59 | 0,19   |
| 44                          | 1,14       | 0,68   | 0,93        | 0,81   | 0,57   | 0,42   | 0,68 | 0,59   |
| 48                          | 0,65       | 0,35   | 0,78        | 0,66   | 0,61   | 0,30   | 0,64 | 0,46   |

91



92

93

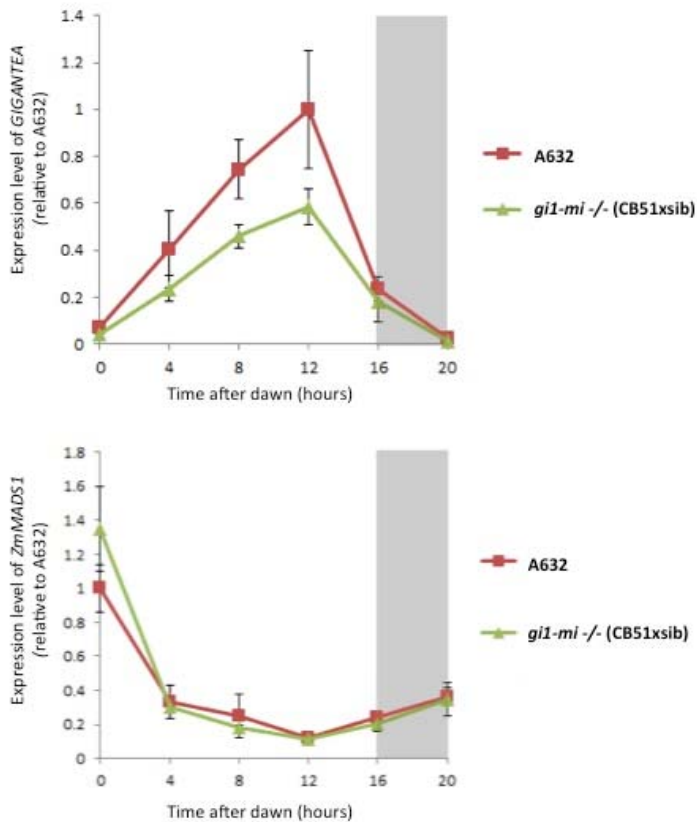

94

95 **Supplemental Figure S4.** Diurnal expression of *ZmMADS1* is not dependent on  
96 *GIGANTEA*. Experiment was performed according to Bendix et al. (2013). Above:  
97 Expression level of *GIGANTEA* was reduced in the *gi1-mi-/- (CB51xsib)* mutant allele  
98 under LD conditions compared with inbreed line A632 containing the same genetic  
99 background. Plants were grown under LD condition in the greenhouse. Samples from  
100 the uppermost leaf of V8 stage were taken. Diurnal regulation of *ZmMADS1* was not  
101 altered in the *gi1-mi-/- (CB51xsib)* mutant allele. Sampling was done as described above.  
102 Mean of three biological replicates are shown and error bars are standard deviation of  
103 the mean. Relative expression levels are shown with red and green lines, respectively.  
104 Grey areas indicate dark periods. The highest expression level of the control was set to 1  
105 in each experiment and relative gene expression levels calculated accordingly.

106

107

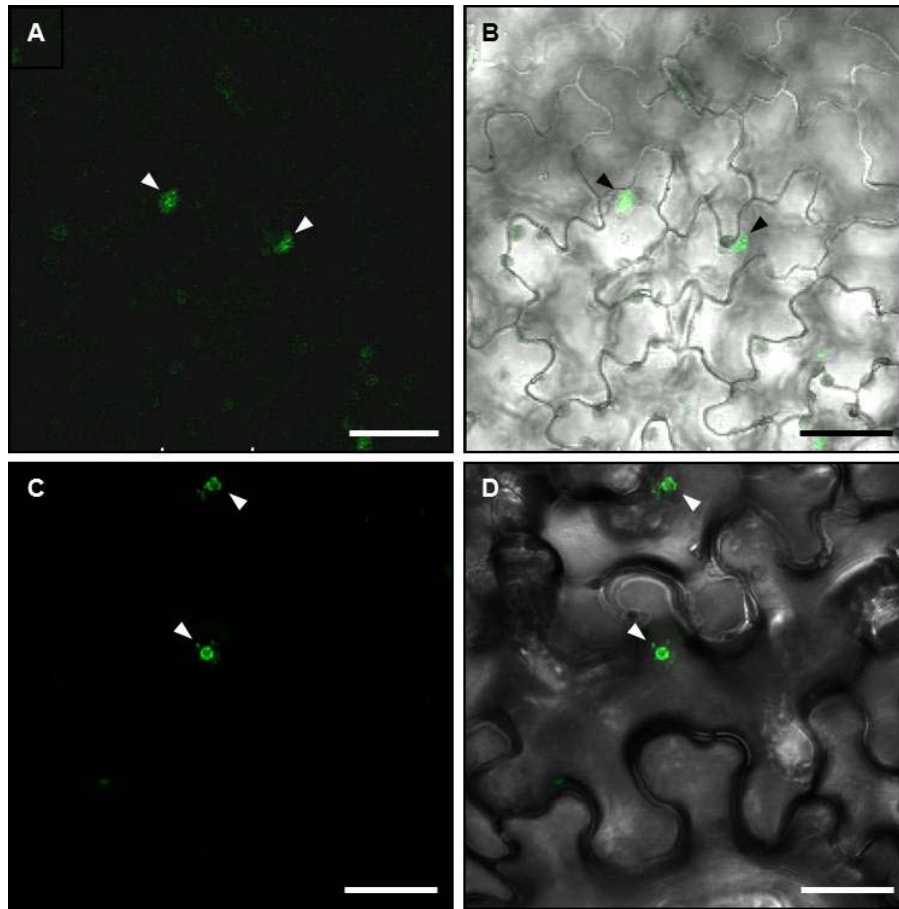

109

110

111 **Supplemental Figure S5.** Subcellular localization of ZmMADS1-GFP. A and B, Confocal  
 112 laser scanning microscopy (CLSM) image of *Arabidopsis soc1-2* leaf epidermis cells (A)  
 113 and *Nicotiana benthamiana* leaf epidermis (C) cells transiently transformed with  
 114 p35S:ZmMADS1-GFP. Fluorescence signal was detected in the nucleus (arrow heads). B  
 115 and D, Merge of fluorescence and bright field image of *Arabidopsis soc1-2* leaf (B) and  
 116 tobacco leaf (D). The scale bar represents 25  $\mu\text{m}$ .

117

118

119

120

121

122 **Supplemental Table S9.** Flowering time in *pUBI:MADS1* plants given as days after  
 123 emergence of plants until reaching VT, anthesis and R1 (silking). The height from the  
 124 bottom to the lowest branch of the tassels is indicated in cm. Numbers of plants (n),  
 125 mean values and  $\pm$  standard deviation are indicated. Asterisks indicate highly significant  
 126 differences ( $p \leq 0.01$ ) to the control plants.

|                                  | Days to VT                | Days to anthesis          | Days to R1                 | Height in cm                |
|----------------------------------|---------------------------|---------------------------|----------------------------|-----------------------------|
| <b><i>pUBI:MADS1</i> group 1</b> | 66.7 $\pm$ 4.45 (n = 9)   | 68.7 $\pm$ 4.55 (n = 9) * | 79.3 $\pm$ 10.39 (n = 9)   | 243.2 $\pm$ 16.70 (n = 9) * |
| <b><i>pUBI:MADS1</i> group 2</b> | 62.6 $\pm$ 11.53 (n = 12) | 66.2 $\pm$ 5.27 (n = 12)  | 77.2 $\pm$ 8.28 (n = 11)   | 221.3 $\pm$ 13.21 (n = 12)  |
| <b><i>pUBI:MADS1</i> group 3</b> | 56.7 $\pm$ 2.05 (n = 7) * | 57.7 $\pm$ 2.31 (n = 7) * | 62.9 $\pm$ 4.91 (n = 8) *  | 160.6 $\pm$ 47.71 (n = 8) * |
| <b>Control</b>                   | 63.1 $\pm$ 5.28 (n = 59)  | 64.3 $\pm$ 4.73 (n = 57)  | 78,7.7 $\pm$ 9.96 (n = 48) | 224.7 $\pm$ 18.89 (n = 58)  |

127

128

129

130 **Supplemental Table S10.** Flowering time in *pUBI:MADS1-RNAi* plants given as days  
 131 after emergence of plants until reaching anthesis and R1 (silking), respectively. The  
 132 height from the bottom to the lowest branch of the tassels is indicated in cm. Numbers of  
 133 plants (n), mean values and  $\pm$  standard deviation are indicated. Asterisks mark  
 134 significant differences ( $p \leq 0.05$ ), while two asterisks mark highly significant differences  
 135 ( $p \leq 0.01$ ) to control plants.

|                                       | Days to anthesis            | Days to R1                  | Height in cm                 |
|---------------------------------------|-----------------------------|-----------------------------|------------------------------|
| <b><i>pUBI:MADS1-RNAi</i> group 1</b> | 67.6 $\pm$ 1.71 (n = 10)    | 74.3 $\pm$ 4.32 (n = 10)    | 149.1 $\pm$ 11.73 (n = 10)   |
| <b><i>pUBI:MADS1-RNAi</i> group 2</b> | 73.3 $\pm$ 2.45 (n = 10) ** | 78.8 $\pm$ 0.92 (n = 10) ** | 158.8 $\pm$ 15.62 (n = 10) * |
| <b>Control</b>                        | 68.9 $\pm$ 2.61 (n = 12)    | 74.3 $\pm$ 3.31 (n = 12)    | 143.5 $\pm$ 14.69 (n = 12)   |

136

137

138

139

140

141

142

| Name                  | Sequence                  |
|-----------------------|---------------------------|
| ZmGAPDH-fwd           | AGGGTCCACTCAAGGGTATCAT    |
| ZmGAPDH-rev           | ACGAGCTTGACGAAGTGGTC      |
| ZmMADS1-fwd           | ACGTGGAGGACGGTCACCGG      |
| ZmMADS1-rev           | GACCTGACCGCCACTGCAGC      |
| ZmMADS56-fwd          | TGCAAGCCAAGCCCAAGCCA      |
| ZmMADS56-rev          | TGAGCAGGCCGGAGCAGCTA      |
| GRMZM2G070034-fwd     | GACCCTGCTCCAAGACAACA      |
| GRMZM2G070034-rev     | TCCCTGCCGGGTAATCCTAT      |
| ZMM26-fwd             | GGCAGATGAGAGGTGAAGA       |
| ZMM26-rev             | GACAAGGAGCCTCATTTCTG      |
| ZMM19-fwd             | TGATCTGGGTGGAGCTGCGG      |
| ZMM19-rev             | CTACGCTCAGTTGTATGCAGACTC  |
| ZmGIGZ1a-fwd          | AGCCCGTCCTACCGGTGCC       |
| ZmGIGZ1a-rev          | TTGGAAGCCGATGTCAGATCCAGGA |
| GRMZM2G053977_T01-fwd | AACTTCTTGAAGGCCCGATT      |
| GRMZM2G053977_T01-rev | ATCACATGCTTTGTGCCGTA      |
| GRMZM2G070034_T01-fwd | GCCGTAAGCTTGGCAAGTAG      |
| GRMZM2G070034_T01-rev | AGCAGGGTCCTCTCCTTCTC      |
| GRMZM2G171365_T01-fwd | GGCAGAGACTACCGCTCAAG      |
| GRMZM2G171365_T01-rev | CTTGCATCTCGATCTCCACA      |
| GRMZM2G363229_T01-fwd | TGCTGATGATGCTGATAGGC      |
| GRMZM2G363229_T01-rev | AGAGCTGGAGGACGACTACG      |
| GRMZM2G322047_T01-fwd | GCATCCGAATCCTGTCAAGT      |
| GRMZM2G322047_T01-rev | CTCAGACGAGCACACCAAAA      |
| GRMZM2G459841_T01-fwd | ATGGAGACCTCTGAGCGGAA      |
| GRMZM2G459841_T01-rev | GCGATACGTCCACACCTCAT      |
| GRMZM2G113480_T01-fwd | GAAACGAAGCTGACCAGGAG      |
| GRMZM2G113480_T01-rev | CCACCATCTTGCTCTTCCAC      |
| GRMZM2G088964_T01-fwd | CTGCGAATGAAGCTGCACAA      |
| GRMZM2G088964_T01-rev | TGCATGCGAACTGTTCTATTTTGA  |
| GRMZM2G127581_T01-fwd | AAAGGCATTGCTTCTTTGA       |

|                       |                        |
|-----------------------|------------------------|
| GRMZM2G127581_T01-rev | ATGATTGCCCAAGAAGATGC   |
| AC197143.3_FGT007-fwd | CCAGCAGCAGCATAGCAGTA   |
| AC197143.3_FGT007-rev | CCTGCTCCTTCTCCTTCTCC   |
| GRMZM2G046885_T01-fwd | GAGGCTCCTTGTCGATTCTG   |
| GRMZM2G046885_T01-rev | AACGGTACAAGCGGAACATC   |
| GRMZM2G046885_T02-fwd | GGAAAACAGAACAGCCTTCG   |
| GRMZM2G046885_T02-rev | GCACCCTATGCAGACCAGAT   |
| GRMZM2G168898_T01-fwd | ACGGGGAACACACAAAACAT   |
| GRMZM2G168898_T01-rev | GCAGGAAGGAGAACATCTGC   |
| GRMZM2G370777_T04-fwd | AACTGGCAGAGGAGAACAGG   |
| GRMZM2G370777_T04-rev | TGTGAACTCCCAGAATGCAA   |
| GRMZM2G009475_T01-fwd | ACGCCTTCATCACCAAGTTC   |
| GRMZM2G009475_T01-rev | TATTTATAGGCCCCCGTGCT   |
| GRMZM2G052034_T02-fwd | CTGCTACTCGACGACCCTTC   |
| GRMZM2G052034_T02-rev | ATATGGGGCACGAGAACTTG   |
| GRMZM2G469898_T01-fwd | CACACCCACACCTCATCCTGA  |
| GRMZM2G469898_T01-rev | CGCATGTGCGGTAAGAGACG   |
| GRMZM2G101634_T01-fwd | GAGAGGAGGCAGGAGATGTG   |
| GRMZM2G101634_T01-rev | ATCCTTGGCTCGGAGAAGAT   |
| AC233935.1_FGT005-fwd | GCAGGAAGGGTCATCAAAGA   |
| AC233935.1_FGT005-rev | CGAAGAATGGAATCCAGGAA   |
| GIGANTEA-fwd          | CCATTCTGGATCTGACATCG   |
| GIGANTEA-rev          | ATTAGAGCCGTCCTACTCGC   |
| GRMZM5G816228-fwd     | CGAGACCAGGAGAACCAAAAG  |
| GRMZM5G816228-rev     | TGAGGAGTTTGTCCATAACCAC |
| GRMZM2G393334_T01-fwd | ATCTCGTTGGGGATGTCTTG   |
| GRMZM2G393334_T01-rev | AGCACCGTTCAAATGTCTCC   |

145

146

147

148

149

150 **Supplemental Table S12.** Primers used in this study for cloning.

| <b>Name</b>             | <b>Sequence</b>                  |
|-------------------------|----------------------------------|
| CDS MADS1 5' pENTR      | CACCATGGTGCGGGGCAAGACGCAGATG     |
| CDS MADS1 3'            | CTAGCCTGACCTGACCGCCACTG          |
| CDS MADS1 3' degenBamHI | GGATCMGCCTGACCTGACCGCCACTG       |
| M5RNAi-s-BSRGI          | GACACATGTACAAAGCAGAAGGAGATGAGTCT |
| M5RNAi-s-MluI           | GACACAACGCGTTCTCCACGTCCATCCCGTCG |
| M5RNAi-a-BamH           | GACACAGGATCCTCTCCACGTCCATCCCGTCG |
| M5RNAi-a-EcoRI          | GACACAGAATTCAAGCAGAAGGAGATGAGTCT |
| M5RNAi1-XmaI-f          | GACACACCCGGGCTGCAGTGCAGCGTGACCCG |
| M5RNAi1-HindIII-r       | GACACAAAGCTTTAAATTGAACGGAGAATATT |

151

152
